# Supplementary material for: Underwater near-infrared spectroscopy can measure training adaptations in adolescent swimmers
Source: PeerJ. 2018 Apr 20;6:e4393. doi: 10.7717/peerj.4393 (PMC5912205; doi:10.7717/peerj.4393)
Supplement: Supplemental Information 1 [file peerj-06-4393-s001.xlsx]

## Sheet: Descriptive Statistics
Subject Number	Age (yrs)	Sex	Dominant Side	Skinfold (mm)	Height (cm)	Weight (kg)	Stroke	200m PB	100m PB
S1	14	Male	Right	14	170	70	Free	02:07:00	58
S2	19	Male	Right	14	187	81	Free	01:57:00	55
S4	16	Male	Right	13	173	62	Breast	00:02:14.400000	00:01:01.500000
S5	16	Male	Right	15	165	60	Fly	00:02:15.020000	00:01:01.020000
S6	17	Female	Right	22	165	63	Fly	00:02:15.920000	00:01:01.600000
S7	15	Female	Right	26	168	57	Free	00:02:17.600000	00:01:03.500000
S8	15	Female	Right	17	175	76	Breast	00:02:15.090000	00:01:04.170000
S9	14	Male	Right	14	175	67	Back	00:02:17.490000	00:01:02.560000
S10	15	Female	Right	14	160	53	Fly/Free	00:02:13.250000	59.32
S11	12	Female	Left	15	154	38	Breast	00:02:21.360000	00:01:05.600000
S12	15	Male	Right	6	177	60	Breast	00:02:11.080000	00:01:00.090000
S13	14	Male	Right	22	167	67	Back	00:02:21.850000	00:01:04.920000
S14	15	Male	Right	11	175	67	Fly	00:02:18.540000	00:01:01.180000
S15	17	Male	Right	X	187	78	Free	X	X
Mean	15.2857			15.6154	171.286	64.2143
SD	1.68379			5.18875	9.22729	11.0047

## Sheet: Swim Data & RPE
PRE	Subject S1	25m	50m	75m	100m	Total	HR	IMM	1min	2min	RPE		Post	Subject S1	25m	50m	75m	100m	Total	HR	IMM	1min	2min	RPE
	1	14	17	18	19	68		175	121	102	18			1	15	17	18	18	68		180	136	99	17
	2	16	16	18	18	68		183	135	110	18			2	15	18	17	17	67		185	131	119	17
	3	15	16	17	18	66		186	138	119	18			3	16	17	17	18	68		188	143	121	16
	4	16	16	18	18	68		187	142	117	18			4	15	16	18	18	67		188	136	123	16
	5	14	17	19	17	67		189	139	120	19			5	15	17	17	17	66		193	137	119	18
	Average	15	16.4	18	18	67.4		184	135	113.6	18.2			Average	15.2	17	17.4	17.6	67.2		186.8	136.6	116.2	16.8
	SD	1	0.547723	0.707107	0.707107	0.894427		5.47723	8.21584	7.56968	0.447214			SD	0.447214	0.707107	0.547723	0.547723	0.83666		4.76445	4.27785	9.75705	0.83666
Pre	Subject S2	25m	50m	75m	100m	Total	HR	IMM	1min	2min	RPE			Subject S2	25m	50m	75m	100m	Total	HR	IMM	1min	2min	RPE
	1	13	17	15	18	63		182	152	122	17		Post	1	15	16	17	18	66		184	141	129	18
	2	14	16	16	19	65		187	150	135	18			2	15	16	17	18	66		188	141	130	19
	3	15	17	16	18	66		187	140	134	18			3	15	16	17	18	66		189	144	132	19
	4	15	15	18	17	65		194	163	136	19			4	15	15	17	18	65		192	153	135	18
	5	15	17	17	19	68		198	157	133	19			5	15	16	17	17	65		193	155	133	19
	Average	14.4	16.4	16.4	18.2	65.4		189.6	152.4	132	18.2			Average	15	15.8	17	17.8	65.6		189.2	146.8	131.8	18.6
	SD	0.894427	0.894427	1.14018	0.83666	1.81659		6.34823	8.56154	5.70088	0.83666			SD	0	0.447214	0	0.447214	0.547723		3.56371	6.72309	2.38747	0.547723
Pre	Subject S4	25m	50m	75m	100m	Total	HR	IMM	1min	2min	RPE		Post	Subject S4	25m	50m	75m	100m	Total	HR	IMM	1min	2min	RPE
	1	15	17	18	18	68		162	120	109	18			1	15	16	17	18	66		170	119	111	18
	2	17	16	18	18	69		168	131	117	17			2	14	17	18	18	67		172	118	117	18
	3	14	19	18	18	69		171	124	113	17			3	16	16	17	19	68		174	116	121	18
	4	16	17	17	19	69		179	126	120	17			4	14	18	18	17	67		174	132	111	18
	5	15	17	17	19	68		178	135	115	19			5	15	18	17	17	67		180	133	117	19
	Average	15.4	17.2	17.6	18.4	68.6		171.6	127.2	114.8	17.6			Average	14.8	17	17.4	17.8	67		174	123.6	115.4	18.2
	SD	1.14018	1.09545	0.547723	0.547723	0.547723		7.09225	5.89067	4.14729	0.894427			SD	0.83666	1	0.547723	0.83666	0.707107		3.74166	8.20366	4.3359	0.447214
Pre	Subject S5	25m	50m	75m	100m	Total	HR	IMM	1min	2min	RPE		Post	Subject S5	25m	50m	75m	100m	Total	HR	IMM	1min	2min	RPE
	1	15	16	18	19	68		175	151	130	18			1	15	16	17	19	67		180	144	129	19
	2	15	17	18	19	69		174	150	140	17			2	15	17	19	17	68		179	154	136	18
	3	15	18	18	20	71		173	163	138	16			3	15	18	18	18	69		183	156	132	17
	4	17	18	19	20	74		179	164	141	15			4	15	18	18	19	70		181	159	134	17
	5	17	19	20	19	75		177	161	137	16			5	15	19	18	19	71		185	154	141	18
	Average	15.8	17.6	18.6	19.4	71.4		175.6	157.8	137.2	16.4			Average	15	17.6	18	18.4	69		181.6	153.4	134.4	17.8
	SD	1.09545	1.14018	0.894427	0.547723	3.04959		2.40832	6.76018	4.32435	1.14018			SD	0	1.14018	0.707107	0.894427	1.58114		2.40832	5.63915	4.50555	0.83666
Pre	Subject S6	25m	50m	75m	100m	Total	HR	IMM	1min	2min	RPE		Post	Subject S6	25m	50m	75m	100m	Total	HR	IMM	1min	2min	RPE
	1	15	16	19	18	68		170	147	114	15			1	16	19	18	21	74		166	115	82	14
	2	16	16	18	20	70		175	161	135	17			2	17	18	18	20	73		170	134	102	15
	3	16	18	19	20	73		174	154	133	18			3	17	18	18	19	72		174	142	115	15
	4	16	18	19	21	74		175	157	130	18			4	16	18	19	19	72		176	144	115	16
	5	16	20	20	21	77		172	149	128	19			5	16	19	17	21	73		176	148	117	17
	Average	15.8	17.6	19	20	72.4		173.2	153.6	128	17.4			Average	16.4	18.4	18	20	72.8		172.4	136.6	106.2	15.4
	SD	0.447214	1.67332	0.707107	1.22474	3.50714		2.16795	5.72713	8.27647	1.51658			SD	0.547723	0.547723	0.707107	1	0.83666		4.3359	13.1072	14.7885	1.14018
Pre	Subject S7	25m	50m	75m	100m	Total	HR	IMM	1min	2min	RPE		Post	Subject S7	25m	50m	75m	100m	Total	HR	IMM	1min	2min	RPE
	1	15	17	18	19	69		185	170	146	15			1	16	18	19	18	71		186	149	128	14
	2	15	18	18	19	70		190	176	150	16			2	16	18	18	18	70		186	159	141	15
	3	17	18	17	20	72		192	177	151	17			3	16	19	17	19	71		191	157	133	15
	4	16	19	18	19	72		192	178	153	18			4	16	18	18	19	71		194	165	137	17
	5	17	18	19	20	74		194	183	156	19			5	17	18	18	18	71		193	167	133	18
	Average	16	18	18	19.4	71.4		190.6	176.8	151.2	17			Average	16.2	18.2	18	18.4	70.8		190	159.4	134.4	15.8
	SD	1	0.707107	0.707107	0.547723	1.94936		3.43511	4.65833	3.70135	1.58114			SD	0.447214	0.447214	0.707107	0.547723	0.447214		3.80789	7.12741	4.87852	1.64317
Pre	Subject S8	25m	50m	75m	100m	Total	HR	IMM	1min	2min	RPE		Post	Subject S8	25m	50m	75m	100m	Total	HR	IMM	1min	2min	RPE
	1	15	17	17	19	68		175	145	126	19			1	14	18	17	18	67		174	139	117	19
	2	15	17	18	19	69		179	153	133	19			2	15	17	18	19	69		174	147	128	20
	3	15	19	18	21	73		177	154	132	19			3	14	17	18	19	69		176	149	123	20
	4	15	19	19	21	74		177	148	130	19			4	16	18	18	19	71		176	143	122	20
	5	16	18	19	21	74		180	146	128	19			5	16	18	18	19	71		177	140	117	20
	Average	15.2	18	18.2	20.2	71.6		177.6	149.2	129.8	19			Average	15	17.6	17.8	18.8	69.4		175.4	143.6	121.4	19.8
	SD	0.447214	1	0.83666	1.09545	2.88097		1.94936	4.08656	2.86356	0			SD	1	0.547723	0.447214	0.447214	1.67332		1.34164	4.3359	4.61519	0.447214
Pre	Subject S9	25m	50m	75m	100m	Total	HR	IMM	1min	2min	RPE		Post	Subject S9	25m	50m	75m	100m	Total	HR	IMM	1min	2min	RPE
	1	13	17	18	17	65		160	127	120	17			1	14	17	16	17	64		177	123	125	16
	2	15	16	18	18	67		167	140	125	18			2	14	18	16	18	66		180	139	126	18
	3	16	16	18	18	68		166	143	124	17			3	15	17	17	17	66		180	135	129	18
	4	15	17	18	19	67		164	143	122	18			4	15	17	17	18	67		179	134	122	19
	5	16	17	18	19	70		165	131	114	19			5	14	17	18	17	66		185	129	117	19
	Average	15	16.6	18	18.2	67.4		164.4	136.8	121	17.8			Average	14.4	17.2	16.8	17.4	65.8		180.2	132	123.8	18
	SD	1.22474	0.547723	0	0.83666	1.81659		2.70185	7.36206	4.3589	0.83666			SD	0.547723	0.447214	0.83666	0.547723	1.09545		2.94958	6.16441	4.54973	1.22474
Pre	Subject S10	25m	50m	75m	100m	Total	HR	IMM	1min	2min	RPE		Post	Subject S10	25m	50m	75m	100m	Total	HR	IMM	1min	2min	RPE
	1	14	16	19	18	67		172	146	114	16			1	14	16	17	17	64					18
	2	15	17	18	18	68		169	144	130	18			2	14	17	16	17	64					18
	3	15	17	16	20	68		156	148	135	18			3	14	17	16	18	65					19
	4	16	17	18	19	70		160	146	138	19	*HR DATA		4	14	16	18	17	65					20
	5	15	17	18	19	69		179	169	148	19			5	15	16	17	17	65					20
	Average	15	16.8	17.8	18.8	68.4		167.2	150.6	133	18			Average	14.2	16.4	16.8	17.2	64.6					19
	SD	0.707107	0.447214	1.09545	0.83666	1.14018		9.25743	10.3827	12.49	1.22474			SD	0.447214	0.547723	0.83666	0.447214	0.547723					1
Pre	Subject S11	25m	50m	75m	100m	Total	HR	IMM	1min	2min	RPE		Post	Subject S11	25m	50m	75m	100m	Total	HR	IMM	1min	2min	RPE
	1	15	18	17	20	70		181	142	123	18			1	15	19	18	19	71		186	142	125	16
	2	15	18	18	21	72		180	157	139	20			2	16	18	19	19	72		185	149	136	18
	3	16	19	21	22	78		178	160	145	20			3	16	18	18	19	71		187	154	138	19
	4	15	21	21	22	79		177	159	145	20			4	16	18	19	19	72		186	164	143	19
	5	16	21	21	22	80		175	156	143	20			5	17	18	18	20	73		187	166	147	20
	Average	15.4	19.4	19.6	21.4	75.8		178.2	154.8	139	19.6			Average	16	18.2	18.4	19.2	71.8		186.2	155	137.8	18.4
	SD	0.547723	1.51658	1.94936	0.894427	4.49444		2.38747	7.32803	9.27362	0.894427			SD	0.707107	0.447214	0.547723	0.447214	0.83666		0.83666	10.0995	8.34865	1.51658
Pre	Subject S12	25m	50m	75m	100m	Total	HR	IMM	1min	2min	RPE		Post	Subject S12	25m	50m	75m	100m	Total	HR	IMM	1min	2min	RPE
	1	14	17	17	17	65		173	126	97	17			1	14	16	17	17	64		170	121	86	20
	2	14	16	17	16	63		174	149	127	19			2	14	16	16	18	64		174	136	116	20
	3	15	16	17	17	65		176	148	130	19			3	14	17	17	17	65		175	133	115	20
	4	15	16	17	17	65		175	146	128	20			4	14	17	17	18	66		174	131	106	20
	5	15	17	17	17	66		174	142	118	20			5	14	18	17	18	67		173	130	110	20
	Average	14.6	16.4	17	16.8	64.8		174.4	142.2	120	19			Average	14	16.8	16.8	17.6	65.2		173.2	130.2	106.6	20
	SD	0.547723	0.547723	0	0.447214	1.09545		1.14018	9.44458	13.6565	1.22474			SD	0	0.83666	0.447214	0.547723	1.30384		1.92354	5.63028	12.1984	0
Pre	Subject S13	25m	50m	75m	100m	Total	HR	IMM	1min	2min	RPE		Post	Subject S13	25m	50m	75m	100m	Total	HR	IMM	1min	2min	RPE
	1	15	18	18	18	69		172	123	123	16			1	14	18	18	18	68		179	127	120	16
	2	16	18	17	18	69		179	145	129	18			2	16	18	18	17	69		180	145	124	16
	3	16	17	18	18	69		182	143	129	19			3	16	18	18	17	69		184	143	135	17
	4	16	17	18	18	69		184	147	133	19			4	16	17	17	18	68		186	152	137	19
	5	16	16	19	17	68		186	148	126	20			5	16	18	17	17	68		190	146	129	20
	Average	15.8	17.2	18	17.8	68.8		180.6	141.2	128	18.4			Average	15.6	17.8	17.6	17.4	68.4		183.8	142.6	129	17.6
	SD	0.447214	0.83666	0.707107	0.447214	0.447214		5.45894	10.3537	3.74166	1.51658			SD	0.894427	0.447214	0.547723	0.547723	0.547723		4.49444	9.34345	7.17635	1.81659
Pre	Subject S14	25m	50m	75m	100m	Total	HR	IMM	1min	2min	RPE		Post	Subject S14	25m	50m	75m	100m	Total	HR	IMM	1min	2min	RPE
	1	14	15	17	18	64		160	137	117	18			1	14	16	18	17	65		159	124	112	14
	2	14	17	18	18	67		165	142	114	19			2	14	17	17	19	67		158	131	112	15
	3	14	17	18	19	68		167	140	117	20			3	14	18	18	19	69		166	128	113	18
	4	15	18	17	20	70		167	135	118	19			4	15	17	19	18	69		169	131	112	19
	5	15	17	18	19	69		166	140	114	20			5	15	18	18	18	69		168	133	109	20
	Average	14.4	16.8	17.6	18.8	67.6		165	138.8	116	19.2			Average	14.4	17.2	18	18.2	67.8		164	129.4	111.6	17.2
	SD	0.547723	1.09545	0.547723	0.83666	2.30217		2.91548	2.77489	1.87083	0.83666			SD	0.547723	0.83666	0.707107	0.83666	1.78885		5.14782	3.50714	1.51658	2.58844
Pre	Subject S15	25m	50m	75m	100m	Total	HR	IMM	1min	2min	RPE		Post	Subject S15	25m	50m	75m	100m	Total	HR	IMM	1min	2min	RPE
	1	14	15	18	17	64		189	171	148	17			1
	2	15	17	18	20	70		187	167	152	19			2
	3	15	17	19	21	72		188	169	163	20			3
	4	16	19	19	21	75		187	168	162	20			4
	5	16	19	20	20	75		188	169	149	20			5
	Average	15.2	17.4	18.8	19.8	71.2		187.8	168.8	154.8	19.2			Average
	SD	0.83666	1.67332	0.83666	1.64317	4.54973		0.83666	1.48324	7.19027	1.30384			SD
			RPE (6-20)			RPE (6-20)
			PRE	POST		PRE	POST
			18	16		18	16
			17	18		17	18
			16	17		16	17
			17	15		17	15
			17	15		17	15
			19	19		19	19
			17	18		17	18
			18	19		18	19
			19	18		19	18
			19	20		19	20
			18	17		18	17
			19	17		19	17
			18.13	17.83		17.8333	17.4167
			±0.96	±1.41		1.02986	1.56428
						0.317685

## Sheet: Swim & HR
PRE	Subject	25m	50m	75m	100m	total	PRE	HR1	HR2	HR3	POST	Subject	25m	50m	75m	100m	total	POST	HR1	HR2	HR3
	s1	15	16.4	18	18	67.4		184	135	113		s1	15.2	17	17.4	17.6	67.2		186	136	116
	s4	15.4	17.2	17.6	18.4	68.6		171	127	114		s4	14.8	17	17.4	17.8	67		174	123	115
	s5	15.8	17.6	18.6	19.4	71.4		175	157	137		s5	15	17.6	18	18.4	69		181	153	134
	s6	15.8	17.6	19	20	72.4		173	153	128		s6	16.4	18.4	18	20	72.8		172	136	106
	s7	16	18	18	19.4	71.4		190	177	151		s7	16.2	18.2	18	18.4	70.8		190	159	134
	s8	15.2	18	18.2	20.2	71.6		177	149	129		s8	15	17.6	17.8	18.8	69.4		175	143	121
	s9	15	16.6	18	18.2	67.4		164	137	121		s9	14.4	17.2	16.8	17.4	65.8		180	132	123
	s10	15	16.8	17.8	18.8	68.4						s10	14.2	16.4	16.8	17.2	64.6
	s11	15.5	19.4	19.6	21.4	75.8		178	155	139		s11	16	18.2	18.4	19.2	71.8		187	155	137
	s12	14.6	16.4	17	16.8	64.8		174	142	120		s12	14	16.8	16.8	17.6	65.2		173	130	107
	s13	15.8	17.2	18	17.8	68.8		180	141	128		s13	15.6	17.8	17.6	17.4	68.4		183	142	129
	s14	14.4	16.8	17.6	18.8	67.6		165	139	116		s14	14.4	17.2	18	18.2	67.8		164	129	112
	AVG	15.2917	17.3333	18.1167	18.9333	69.6333		175.545	146.545	126.909		AVG	15.1	17.45	17.5833	18.1667	68.3167		178.636	139.818	121.273
	SD	0.510718	0.862695	0.684681	1.23681	2.9626		7.63366	13.6775	11.8191		SD	0.80227	0.621582	0.549104	0.843514	2.57888		7.77525	11.7202	11.0643
Subject	PRE T (s)	POST T (s)				PRE	PRE				POST	POST
s1	67.4	67.2			Subject	HR MAX	HR MIN			Subject	HR MAX	HR MIN
s4	68.6	67			s1	184	113			s1	186	116
s5	71.4	69			s2	189	132			s2	189	131
s6	72.4	72.8			s4	171	114			s4	174	115
s7	71.4	70.8			s5	175	137			s5	181	134
s8	71.6	69.4			s6	173	128			s6	172	106
s9	67.4	65.8			s7	190	151			s7	190	134
s10	68.4	64.6			s8	177	129			s8	175	121
s11	75.8	71.8			s9	164	121			s9	180	123
s12	64.8	65.2			s11	178	139			s11	187	137
s13	68.8	68.4			s12	174	120			s12	173	107
s14	67.6	67.8			s13	180	128			s13	183	129
Average	69.6333	68.3167			s14	165	116			s14	164	112
SD	2.9626	2.57888			Average	176.667	127.333			Average	179.5	122.083
					SD	8.24989	11.3645			SD	7.99432	10.9167

## Sheet: NIRS Delta Data
PRE	S1										POST	S1
Sprint	02 MIN	02 Max	Delta 02	HB MIN	HB Max	Delta HB	tHb MIN	tHb MAX	Delta tHb		Sprint	02 MIN	02 Max	Delta 02	HB MIN	HB Max	Delta HB	tHb MIN	tHb MAX	Delta tHb
S1	-2.83	-11.76	-8.93	-1.29	3.77	5.06	-4.13	-9.13	-5		S1	-2.8	-9.94	-7.14	-1.77	4.11	5.88	-3.61	-5.19	-1.58
S2	-1.34	-11.54	-10.2	-0.73	4.01	4.74	-2.08	-8.9	-6.82		S2	0.1	-10.01	-10.11	0	5.12	5.12	1.09	-4.35	-5.44
S3	-0.79	-12.21	-11.42	-0.46	4.11	4.57	-1.26	-9.2	-7.94		S3	1.52	-9.42	-10.94	0.77	5.83	5.06	3.3	-3.86	-7.16
S4	1.33	-12.05	-13.38	-0.53	4.18	4.71	1.87	-8.63	-10.5		S4	2.4	-9.02	-11.42	0.6	5.99	5.39	4	-3.21	-7.21
S5	-0.48	-11.7	-11.22	-0.98	4.12	5.1	-1.46	-8.88	-7.42		S5	6.9	-8.78	-15.68	0.99	5.92	4.93	8.92	-2.58	-11.5
AVG			-11.03			4.836			-7.536		AVG			-11.058			5.276			-6.578
SD			1.6439			0.232228			1.99411		SD			3.07235			0.377001			3.57908
PRE	S4										POST	S4
Sprint	02 MIN	02 Max	Delta 02	HB MIN	HB Max	Delta HB	tHb MIN	tHb MAX	Delta tHb		Sprint	02 MIN	02 Max	Delta 02	HB MIN	HB Max	Delta HB	tHb MIN	tHb MAX	Delta tHb
S1	-5.24	-12.11	-6.87	-2.3	3.54	5.84	-7.55	-8.59	-1.04		S1	-3.86	-13.18	-9.32	-0.81	6.31	7.12	-4.68	-8.46	-3.78
S2	1.25	-13.46	-14.71	1.58	3.53	1.95	2.83	-10.26	-13.09		S2	-0.49	-13.31	-12.82	1.25	6.72	5.47	0.75	-7.41	-8.16
S3	-1.06	-13.82	-12.76	0.88	3.49	2.61	-0.18	-10.65	-10.47		S3	-0.6	-13.82	-13.22	1.5	7.46	5.96	0.89	-7.4	-8.29
S4	-0.65	-13.94	-13.29	0.45	3.5	3.05	-0.2	-10.08	-9.88		S4	0.5	-13.93	-14.43	1.04	7.54	6.5	1.54	-7.04	-8.58
S5	2.51	-13.79	-16.3	1.19	3.53	2.34	3.71	-10.53	-14.24		S5	1.93	-13.72	-15.65	1.3	7.91	6.61	3.23	-5.24	-8.47
AVG			-12.786			3.158			-9.744		AVG			-13.088			6.332			-7.456
SD			3.58133			1.55189			5.18929		SD			2.3797			0.634011			2.06129
PRE	S5										POST	S5
Sprint	02 MIN	02 Max	Delta 02	HB MIN	HB Max	Delta HB	tHb MIN	tHb MAX	Delta tHb		Sprint	02 MIN	02 Max	Delta 02	HB MIN	HB Max	Delta HB	tHb MIN	tHb MAX	Delta tHb
S1	-4.93	-15.69	-10.76	-3.16	6.51	9.67	-8.01	-9.04	-1.03		S1	-3.84	-11.85	-8.01	-3.95	5.93	9.88	-7.79	-7.79	0
S2	-3.82	-16.6	-12.78	1.64	8.53	6.89	2.17	-15.69	-17.86		S2	-1.48	-13.84	-12.36	2.26	7.53	5.27	0.77	-7.33	-8.1
S3	-6.14	-15.69	-9.55	2.89	9.33	6.44	-3.24	-6.97	-3.73		S3	-0.34	-13.49	-13.15	2.53	8.1	5.57	2.19	-8.38	-10.57
S4	-5.06	-19.07	-14.01	2.48	8.86	6.38	-2.58	-10.07	-7.49		S4	-2.39	-14.89	-12.5	-0.02	7.13	7.15	-2.41	-10.58	-8.17
S5	-4.33	-18.18	-13.85	3.11	7.97	4.86	-1.22	-11.23	-10.01		S5	1.34	-15.01	-16.35	0.86	6.99	6.13	2.2	-9.67	-11.87
AVG			-12.19			6.848			-8.024		AVG			-12.474			6.8			-7.742
SD			1.96409			1.75379			6.48712		SD			2.97579			1.86491			4.61757
PRE	S6										POST	S6
Sprint	02 MIN	02 Max	Delta 02	HB MIN	HB Max	Delta HB	tHb MIN	tHb MAX	Delta tHb		Sprint	02 MIN	02 Max	Delta 02	HB MIN	HB Max	Delta HB	tHb MIN	tHb MAX	Delta tHb
S1	-3.12	-7.1	-3.98	-0.96	0.82	1.78	-4.08	-6.58	-2.5		S1	-3.23	-6.95	-3.72	-0.72	1.87	2.59	3.96	-5.52	-9.48
S2	3.35	-7.06	-10.41	2.32	2.07	-0.25	5.67	-5.79	-11.46		S2	2.02	-7.82	-9.84	0.22	1.73	1.51	2.55	-6.27	-8.82
S3	3.88	-7.06	-10.94	3.67	3.32	-0.35	7.56	-5.23	-12.79		S3	2.81	-9.14	-11.95	0.72	1.4	0.68	3.54	-7.77	-11.31
S4	3.64	-7.4	-11.04	3.81	3.49	-0.32	7.46	-5.58	-13.04		S4	2.96	-9.49	-12.45	0.77	1.31	0.54	3.76	-8.34	-12.1
S5	3.95	-7.37	-11.32	3.91	3.42	-0.49	7.88	-5.66	-13.54		S5	3.08	-9.66	-12.74	0.7	1.33	0.63	3.78	-8.51	-12.29
AVG			-9.538			0.074			-10.666		AVG			-10.14			1.19			-10.8
SD			3.12446			0.957669			4.62929		SD			3.76426			0.874443			1.56788
PRE	S7										POST	S7
Sprint	02 MIN	02 Max	Delta 02	HB MIN	HB Max	Delta HB	tHb MIN	tHb MAX	Delta tHb		Sprint	02 MIN	02 Max	Delta 02	HB MIN	HB Max	Delta HB	tHb MIN	tHb MAX	Delta tHb
S1	-2.38	-8.87	-6.49	-0.6	-0.05	0.55	-2.98	-9.67	-6.69		S1	-2.29	-9.3	-7.01	-1.01	-0.02	0.99	-3.31	-10.46	-7.15
S2	-0.69	-9.8	-9.11	0.93	0.17	-0.76	0.3	-10.6	-10.9		S2	-1.64	-10.99	-9.35	-0.66	-0.61	0.05	-2.3	-12.53	-10.23
S3	-1.88	-10.68	-8.8	0.55	0.34	-0.21	-1.32	-11.55	-10.23		S3	-2.07	-11.82	-9.75	-0.28	-0.75	-0.47	-2.35	-13.42	-11.07
S4	1.09	-11.07	-12.16	1.53	0.47	-1.06	2.65	-12.18	-14.83		S4	-3.07	-12.14	-9.07	-1.21	-1.28	-0.07	-4.28	-14.02	-9.74
S5	3.17	-11.3	-14.47	1.73	0.35	-1.38	4.91	-12.71	-17.62		S5	-0.97	-12.15	-11.18	-0.51	-1.41	-0.9	-1.49	-14.11	-12.62
AVG			-10.206			-0.572			-12.054		AVG			-9.272			-0.08			-10.162
SD			3.12196			0.760966			4.24611		SD			1.5027			0.704699			2.00755
PRE	S8										POST	S8
Sprint	02 MIN	02 Max	Delta 02	HB MIN	HB Max	Delta HB	tHb MIN	tHb MAX	Delta tHb		Sprint	02 MIN	02 Max	Delta 02	HB MIN	HB Max	Delta HB	tHb MIN	tHb MAX	Delta tHb
S1	-4.77	-16.67	-11.9	-1.18	-0.41	0.77	-5.95	-17.4	-11.45		S1	-5.1	-14.28	-9.18	-1.07	2.92	3.99	-6.17	-11.93	-5.76
S2	-8.37	-18.83	-10.46	1.73	-1.05	-2.78	-10.11	-19.95	-9.84		S2	-2.87	-15.19	-12.32	-0.1	3.52	3.62	-2.97	-12.08	-9.11
S3	-4.63	-18.64	-14.01	-0.28	-0.77	-0.49	-4.92	-19.75	-14.83		S3	-1.17	-15.59	-14.42	0.86	3.95	3.09	-0.31	-12.02	-11.71
S4	-4.03	-18.05	-14.02	-0.22	-0.73	-0.51	-4.26	-19.03	-14.77		S4	0.7	-14.72	-15.42	1.75	4.37	2.62	2.46	-10.72	-13.18
S5	-3.94	-17.78	-13.84	-0.67	-0.51	0.16	-4.61	-19.79	-15.18		S5	0.13	-14.52	-14.65	1.55	4.07	2.52	1.68	-10.57	-12.25
AVG			-12.846			-0.57			-13.214		AVG			-13.198			3.168			-10.402
SD			1.60539			1.34374			2.41833		SD			2.5226			0.633696			3.00253
PRE	S9										POST	S9
Sprint	02 MIN	02 Max	Delta 02	HB MIN	HB Max	Delta HB	tHb MIN	tHb MAX	Delta tHb		Sprint	02 MIN	02 Max	Delta 02	HB MIN	HB Max	Delta HB	tHb MIN	tHb MAX	Delta tHb
S1	-2.74	-12.01	-9.27	-0.39	7.43	7.82	-3.13	-5.92	-2.79		S1	-4.11	-10.62	-6.51	-1.43	4.86	6.29	-5.55	-6.49	-0.94
S2	-4.63	-12.83	-8.2	-0.28	7.38	7.66	-4.92	-6.6	-1.68		S2	-1.67	-11.52	-9.85	-2.17	4.52	6.69	-3.85	-7.87	-4.02
S3	-1.19	-13	-11.81	-1.01	7.19	8.2	-2.21	-6.9	-4.69		S3	0.62	-11.48	-12.1	-2.54	3.95	6.49	-1.92	-7.91	-5.99
S4	-3.11	-13.04	-9.93	-1.71	7.21	8.92	-4.82	-6.72	-1.9		S4	2.63	-11.59	-14.22	-2.1	3.89	5.99	0.52	-8.18	-8.7
S5	8.82	-13.08	-21.9	0.93	6.45	5.52	9.76	-7.08	-16.84		S5	7.19	-11.06	-18.25	-2.82	3.95	6.77	4.37	-7.43	-11.8
AVG			-12.222			7.624			-5.58		AVG			-12.186			6.446			-6.29
SD			5.56726			1.27259			6.40539		SD			4.43256			0.315721			4.1843
PRE	S10										POST	S10
Sprint	02 MIN	02 Max	Delta 02	HB MIN	HB Max	Delta HB	tHb MIN	tHb MAX	Delta tHb		Sprint	02 MIN	02 Max	Delta 02	HB MIN	HB Max	Delta HB	tHb MIN	tHb MAX	Delta tHb
S1	-1.85	-21.46	-19.61	-0.1	-0.1	0	-1.95	-23.66	-21.71		S1	-4.29	-21.74	-17.45	0.16	1.44	1.28	-4.13	-21.3	-17.17
S2	-12.43	-22.06	-9.63	-1.5	-0.86	0.64	-13.93	-23.74	-9.81		S2	-11.61	-23.54	-11.93	-1.29	1.08	2.37	-12.88	-22.92	-10.04
S3	-16.17	-22.95	-6.78	-1.88	-0.53	1.35	-18.06	-24.33	-6.27		S3	-12.91	-24.18	-11.27	-0.95	1.41	2.36	-13.86	-23.45	-9.59
S4	-12.95	-23.79	-10.84	-0.16	-0.26	-0.1	-13.12	-25.19	-12.07		S4	-13.25	-24.75	-11.5	-1.31	1.41	2.72	-14.57	-23.95	-9.38
S5	-12.85	-24.04	-11.19	0.36	0.03	-0.33	-12.48	-25.03	-12.55		S5	-13.26	-25.47	-12.21	-1.25	1.2	2.45	-14.52	-24.9	-10.38
AVG			-11.61			0.312			-12.482		AVG			-12.872			2.236			-11.312
SD			4.79632			0.682693			5.72405		SD			2.58517			0.553922			3.29775
PRE	S11										POST	S11
Sprint	02 MIN	02 Max	Delta 02	HB MIN	HB Max	Delta HB	tHb MIN	tHb MAX	Delta tHb		Sprint	02 MIN	02 Max	Delta 02	HB MIN	HB Max	Delta HB	tHb MIN	tHb MAX	Delta tHb
S1	-1.25	-8.62	-7.37	-0.01	4.63	4.64	-1.27	-4.36	-3.09		S1	-4.23	-19.15	-14.92	0.15	9.7	9.55	-4.07	-10.83	-6.76
S2	-1.32	-9.96	-8.64	1.17	5.5	4.33	-0.14	-4.5	-4.36		S2	-1.63	-20.32	-18.69	2.16	9.68	7.52	0.53	-11.34	-11.87
S3	-2.84	-10.8	-7.96	1.63	6.44	4.81	-1.2	-4.42	-3.22		S3	-2.96	-20.79	-17.83	2.1	9.87	7.77	-0.85	-11.8	-10.95
S4	-2.86	-10.86	-8	2.45	6.76	4.31	-0.4	-4.14	-3.74		S4	-3.44	-21.17	-17.73	1.5	9.79	8.29	-1.93	-11.78	-9.85
S5	-3.29	-11.01	-7.72	2.77	6.7	3.93	-0.51	-4.98	-4.47		S5	-4.09	-21.57	-17.48	2.89	11.27	8.38	-1.11	-11.68	-10.57
AVG			-7.938			4.404			-3.776		AVG			-17.33			8.302			-10
SD			0.465639			0.33894			0.63319		SD			1.42216			0.783945			1.9522
PRE	S12										POST	S12
Sprint	02 MIN	02 Max	Delta 02	HB MIN	HB Max	Delta HB	tHb MIN	tHb MAX	Delta tHb		Sprint	02 MIN	02 Max	Delta 02	HB MIN	HB Max	Delta HB	tHb MIN	tHb MAX	Delta tHb
S1	-6.48	-23.3	-16.82	-1.68	14.39	16.07	-8.17	-10.11	-1.94		S1	-5.92	-33.58	-27.66	-2.94	29.88	32.82	-8.86	-8.86	0
S2	-2.59	-22.76	-20.17	0.51	14.74	14.23	-2.07	-8.67	-6.6		S2	-0.3	-34.95	-34.65	-0.17	30.92	31.09	-0.48	-8.56	-8.08
S3	-4.4	-25.74	-21.34	1.38	15.68	14.3	-3.01	-10.73	-7.72		S3	-1.87	-34.2	-32.33	-1.21	30.51	31.72	-0.45	-7.22	-6.77
S4	-3.69	-26.02	-22.33	1.01	15.58	14.57	-2.67	-11.37	-8.7		S4	-0.89	-34.22	-33.33	0.94	29.36	28.42	0.04	-6.83	-6.87
S5	-6.41	-24.68	-18.27	-0.45	15.54	15.99	-6.86	-11.87	-5.01		S5	-0.53	-32.46	-31.93	1.38	28.31	26.93	1.91	-5.93	-7.84
AVG			-19.786			15.032			-5.994		AVG			-31.98			30.196			-5.912
SD			2.24331			0.920283			2.64915		SD			2.63338			2.4407			3.35496
PRE	S13										POST	S13
Sprint	02 MIN	02 Max	Delta 02	HB MIN	HB Max	Delta HB	tHb MIN	tHb MAX	Delta tHb		Sprint	02 MIN	02 Max	Delta 02	HB MIN	HB Max	Delta HB	tHb MIN	tHb MAX	Delta tHb
S1	-3.15	-9.63	-6.48	-0.83	0.12	0.95	-3.99	-9.98	-5.99		S1	-3.2	-10.11	-6.91	-0.93	4.45	5.38	-4.13	-10.47	-6.34
S2	-4.77	-10.4	-5.63	-0.88	0.15	1.03	-5.65	-10.84	-5.19		S2	-2.43	-11.45	-9.02	-0.51	4.35	4.86	-2.94	-12.05	-9.11
S3	-2.6	-11.11	-8.51	-0.49	0.11	0.6	-3.09	-11.55	-8.46		S3	-1.49	-11.62	-10.13	-0.27	4.37	4.64	-1.76	-12.47	-10.71
S4	-2.75	-10.96	-8.21	-0.82	0.18	1	-3.57	-11.17	-7.6		S4	-0.7	-12.48	-11.78	-0.77	4.39	5.16	-1.48	-13.78	-12.3
S5	-2.53	-11.2	-8.67	-0.68	-0.03	0.65	-3.21	-11.56	-8.35		S5	-0.15	-12.35	-12.2	-0.46	4.49	4.95	-0.61	-13.56	-12.95
AVG			-7.5			0.846			-7.118		AVG			-10.008			4.998			-10.282
SD			1.36294			0.204524			1.46122		SD			2.15253			0.283584			2.65926
PRE	S14										POST	S14
Sprint	02 MIN	02 Max	Delta 02	HB MIN	HB Max	Delta HB	tHb MIN	tHb MAX	Delta tHb		Sprint	02 MIN	02 Max	Delta 02	HB MIN	HB Max	Delta HB	tHb MIN	tHb MAX	Delta tHb
S1	-9.32	-20.56	-11.24	0	15.71	15.71	-9.31	-9.59	-0.28		S1	-7.19	-19.3	-12.11	-1.97	14.49	16.46	-9.17	-10.06	-0.89
S2	3.17	-19.74	-22.91	2.56	16.73	14.17	5.73	-7.58	-13.31		S2	3.23	-18.86	-22.09	1.97	15.49	13.52	5.2	-7.19	-12.39
S3	0.49	-20.98	-21.47	1.64	16.18	14.54	2.14	-7.16	-9.3		S3	3.04	-18.23	-21.27	1.02	17.36	16.34	4.06	-6.86	-10.92
S4	0.63	-20.69	-21.32	1.81	16.61	14.8	2.45	-15.52	-17.97		S4	2.62	-18.35	-20.97	3	15.53	12.53	5.63	-6.43	-12.06
S5	2.69	-22.29	-24.98	3.1	16.31	13.21	5.8	-14.69	-20.49		S5	0.46	-18.47	-18.93	1.4	15.68	14.28	0.94	-7.43	-8.37
AVG			-20.384			14.486			-12.27		AVG			-19.074			14.626			-8.926
SD			5.31912			0.912102			7.96431		SD			4.06299			1.73476			4.7614
DPF 4.0									Micomolar Units
N	PRE 02HB	Post 02HB	PRE HHb	Post HHB	PRE tHb	Post tHb			Subject	Pre Δ02Hb	Post Δ02Hb	Pre ΔHHb	Post ΔHHb	Pre ΔtHb	Post ΔtHb
Subject									S1	-154.42	-154.84	68.04	73.92	-105.56	-92.12
S1	-11.03	-11.06	4.86	5.28	-7.54	-6.58			S4	-179.06	-183.26	44.24	88.62	-136.36	-104.44
S4	-12.79	-13.09	3.16	6.33	-9.74	-7.46			S5	-170.66	-174.58	95.9	95.2	-112.28	-108.36
S5	-12.19	-12.47	6.85	6.8	-8.02	-7.74			S6	-133.56	-141.96	0.98	16.66	-149.38	-151.2
S6	-9.54	-10.14	0.07	1.19	-10.67	-10.8			S7	-142.94	-129.78	-7.98	-1.12	-168.7	-142.24
S7	-10.21	-9.27	-0.57	-0.08	-12.05	-10.16			S8	-179.9	-184.8	-7.98	44.38	-184.94	-145.6
S8	-12.85	-13.2	-0.57	3.17	-13.21	-10.4			S9	-171.08	-170.66	106.68	90.3	-78.12	-88.06
S9	-12.22	-12.19	7.62	6.45	-5.58	-6.29			S10	-162.54	-180.18	4.34	31.36	-174.72	-158.34
S10	-11.61	-12.87	0.31	2.24	-12.48	-11.31			S11	-111.16	-242.62	61.6	116.2	-52.92	-140
S11	-7.94	-17.33	4.4	8.3	-3.78	-10			S12	-277.06	-447.72	210.42	422.8	-83.86	-82.74
S12	-19.79	-31.98	15.03	30.2	-5.99	-5.91			S13	-105	-140.14	11.9	70	-99.68	-143.92
S13	-7.5	-10.01	0.85	5	-7.12	-10.28			S14	-285.32	-266.98	202.86	204.82	-171.78	-125.02
S14	-20.38	-19.07	14.49	14.63	-12.27	-8.93				-172.725	-201.46	65.9167	104.428	-126.525	-123.503
										53.928	83.6539	73.3349	108.788	41.9574	25.8309

## Sheet: NIRS Recovery Data
	S1							DPF 4.0						Micromolar Units
	pre o2hb	post 02hb	pre thb	post thb
R1	4.02	6.49	7.86	8.25
R2	4.42	6.53	7.82	10.4				Subject	pre 02hb	post o2hb	pre thb	post thb		Subject	pre 02hb	post o2hb	pre thb	post thb
R3	4.81	7.58	7.85	12.8				s1	4.64	7.386	7.434	11.65		s1	64.96	103.404	104.076	163.1
R4	5.38	7.69	6.98	13.63				s4	5.446	5.454	9.778	11.462		s4	76.244	76.356	136.892	160.468
R5	4.55	8.65	6.62	13.15				s5	-0.686	3.862	4.114	9.446		s5	-9.604	54.068	57.596	132.244
AVG	4.636	7.388	7.426	11.646				s6	5.458	6.234	9.88	8.494		s6	76.412	87.276	138.32	118.916
SD	0.504311	0.903228	0.585645	2.2702				s7	4.596	1.878	8.178	4.372		s7	64.344	26.292	114.492	61.208
								s8	-0.334	2.86	0.42	5.904		s8	-4.676	40.04	5.88	82.656
								s9	8.462	10.376	11.816	11.776		s9	118.468	145.264	165.424	164.864
	S4							s10	-9.724	-7.584	-9.076	-6.574		s10	-136.136	-106.176	-127.064	-92.036
	pre o2hb	post 02hb	pre thb	post thb				s11	-0.876	-1.432	3.766	2.188		s11	-12.264	-20.048	52.724	30.632
R1	5.02	2.44	9.72	7.25				s12	3.406	6.618	8.856	15.08		s12	47.684	92.652	123.984	211.12
R2	5.42	4.31	10.37	10.38				s13	4.646	6.856	7.472	9.654		s13	65.044	95.984	104.608	135.156
R3	4.81	6.05	8.45	12.83				s14	5.87	7.904	10.14	13.594		s14	82.18	110.656	141.96	190.316
R4	6.68	7.15	11.98	13.68				Average	2.57533	4.201	6.06483	8.08717		Mean	36.0547	58.814	84.9077	113.22
R5	5.3	7.32	8.37	13.17				SD	4.83987	4.84775	5.75513	5.95209		SD	67.7582	67.8685	80.5718	83.3293
AVG	5.446	5.454	9.778	11.462
SD	0.729849	2.068	1.49572	2.67488
	S6
	pre o2hb	post 02hb	pre thb	post thb
R1	6.23	7.07	9.47	10.25
R2	5.1	7.68	9.31	10.48
R3	4.67	5.74	9.47	7.82
R4	5.08	5.6	10.18	7.04
R5	6.21	5.08	10.97	6.88
AVG	5.458	6.234	9.88	8.494
SD	0.716498	1.09173	0.696276	1.74651
	S8
	pre o2hb	post 02hb	pre thb	post thb
R1	-0.19	3.98	0.88	6.93
R2	-1.75	2.2	-1.02	4.76
R3	-0.84	1.96	0.1	5.4
R4	-0.41	2.64	0.53	6.12
R5	1.52	3.52	1.61	6.31
AVG	-0.334	2.86	0.42	5.904
SD	1.19634	0.863713	0.976704	0.840672
	S9
	pre o2hb	post 02hb	pre thb	post thb
R1	9.66	11.98	12.71	11.81
R2	8.78	11.73	11.94	12.55
R3	8.88	9.98	11.82	12.15
R4	7.6	9.3	11.22	10.64
R5	7.39	8.9	11.43	11.77
AVG	8.462	10.378	11.824	11.784
SD	0.949115	1.40528	0.574134	0.712446
	S10
	pre o2hb	post 02hb	pre thb	post thb
R1	-10.54	-8.15	-11.75	-8.39
R2	-11.12	-8.41	-11.46	-8.3
R3	-10.23	-7.82	-9.12	-6.67
R4	-9.31	-6.63	-7.96	-4.76
R5	-7.42	-6.91	-5.09	-4.75
AVG	-9.724	-7.584	-9.076	-6.574
SD	1.44486	0.778254	2.73721	1.79609
	S12
	pre o2hb	post 02hb	pre thb	post thb
R1	2.45	4.71	5.09	8.27
R2	2.03	7.13	7.73	14.8
R3	3.03	6.53	10.36	17.21
R4	4.37	7.45	9.6	17.24
R5	5.15	7.27	11.5	17.88
AVG	3.406	6.618	8.856	15.08
SD	1.31525	1.12112	2.51281	3.98425
	S14
	pre o2hb	post 02hb	pre thb	post thb
R1	6.22	9.94	9.71	14.82
R2	6.78	11.13	10.94	14.55
R3	6.38	8.4	9.62	15.05
R4	5.58	4.45	10.02	10.88
R5	4.39	5.6	10.41	12.67
AVG	5.87	7.904	10.14	13.594
SD	0.933435	2.83006	0.543737	1.78581

## Sheet: TSI (%) Data
Subject 1	Max	MIN	Delta	PRE	S1	Max	MIN	Delta				Subject 1	Max	MIN	Delta	PRE	Subject 1	Max	MIN	Delta
S1	0.47	-9.82	-10.29		S1	1.65	-8.11	-9.76				S1	0.47	-9.82	-10.29		S1	1.65	-8.11	-9.76
S2	-0.27	-9	-8.73		S2	2.2	-9.94	-12.14				S2	-0.6	-9	-8.4		S2	2.09	-9.94	-12.03
S3	-0.29	-9.37	-9.08		S3	0.58	-10.04	-10.62				S3	-0.44	-9.37	-8.93		S3	1.21	-10.04	-11.25
S4	-0.94	-9.43	-8.49		S4	0.16	-11.4	-11.56				S4	-1.01	-9.43	-8.42		S4	0.36	-11.4	-11.76
S5	-0.73	-9.54	-8.81		S5	-0.27	-11.52	-11.25				S5	-1.09	-9.54	-8.45		S5	0.09	-11.52	-11.61
AVG			-9.08		AVG			-11.066				AVG			-8.898		AVG			-11.282
SD			0.708449		SD			0.913225				SD			0.808684		SD			0.896253
T-test					T-test							T-test					T-test
Subject 4	Max	MIN	Delta	PRE	S4	Max	MIN	Delta				Subject 4	Max	MIN	Delta	PRE	S4	Max	MIN	Delta
S1	-0.48	-13.74	-13.26		S1	-1.66	-14.53	-12.87				S1	-0.48	-13.74	-13.26		S1	-1.66	-14.53	-12.87
S2	-0.67	-14.1	-13.43		S2	-1.85	-14.63	-12.78				S2	-0.34	-14.1	-13.76		S2	-0.63	-14.63	-14
S3	-1.38	-13.83	-12.45		S3	-1.6	-13.49	-11.89				S3	-1.56	-13.83	-12.27		S3	-0.92	-13.49	-12.57
S4	-0.92	-12.96	-12.04		S4	-0.2	-13.25	-13.05				S4	-0.95	-12.96	-12.01		S4	0.64	-13.25	-13.89
S5	0.21	-12.88	-13.09		S5	0.32	-13.6	-13.92				S5	0.38	-12.88	-13.26		S5	0.85	-13.6	-14.45
AVG			-12.854		AVG			-12.902				AVG			-12.912		AVG			-13.556
SD			0.586967		SD			0.724272				SD			0.739439		SD			0.798549
T-test					T-test							T-test					T-test
Subject 5	Max	MIN	Delta	PRE	S5	Max	MIN	Delta				Subject 5	Max	MIN	Delta	PRE	S5	Max	MIN	Delta
S1	0.04	-15.02	-15.06		S1	-0.83	-9.11	-8.28				S1	0.04	-15.02	-15.06		S1	-0.83	-9.11	-8.28
S2	-1.06	-16.13	-15.07		S2	0.34	-11.36	-11.7				S2	-0.8	-16.13	-15.33		S2	0	-11.36	-11.36
S3	-0.85	-16.97	-16.12		S3	1.45	-8.77	-10.22				S3	-1.64	-16.97	-15.33		S3	2.06	-8.77	-10.83
S4	1.11	-16.27	-17.38		S4	7.14	-9.92	-17.06				S4	0.38	-16.27	-16.65		S4	9.63	-9.92	-19.55
S5	0.48	-15.83	-16.31		S5	4.75	-11.21	-15.96				S5	0.14	-15.83	-15.97		S5	4.93	-11.21	-16.14
AVG			-15.988		AVG			-12.644				AVG			-15.668		AVG			-13.232
SD			0.969881		SD			3.75194				SD			0.642977		SD			4.53238
T-test					T-test							T-test					T-test
Subject 6	Max	MIN	Delta	PRE	S6	Max	MIN	Delta				Subject 6	Max	MIN	Delta	PRE	S6	Max	MIN	Delta
S1	-2.36	-9.26	-6.9		S1	-1.81	-8.83	-7.02				S1	-2.36	-9.26	-6.9		S1	-1.81	-8.83	-7.02
S2	-0.79	-9.09	-8.3		S2	2.03	-7.13	-9.16				S2	-0.72	-9.09	-8.37		S2	1.93	-7.13	-9.06
S3	-1.42	-9.95	-8.53		S3	0.65	-7.24	-7.89				S3	-1.47	-9.95	-8.48		S3	0.16	-7.24	-7.4
S4	-1.95	-10.01	-8.06		S4	0.51	-7.37	-7.88				S4	-2.08	-10.01	-7.93		S4	0.26	-7.37	-7.63
S5	-1.9	-9.98	-8.08		S5	1.37	-7.16	-8.53				S5	-2.05	-9.98	-7.93		S5	0.98	-7.16	-8.14
AVG			-7.974		AVG			-8.096				AVG			-7.922		AVG			-7.85
SD			0.629984		SD			0.801143				SD			0.623835		SD			0.78867
T-test					T-test							T-test					T-test
Subject 7	Max	MIN	Delta	PRE	S7	Max	MIN	Delta				Subject 7	Max	MIN	Delta	PRE	S7	Max	MIN	Delta
S1	-1.24	-6.63	-5.39		S1	-0.57	-5.31	-4.74				S1	-1.24	-6.63	-5.39		S1	-0.57	-5.31	-4.74
S2	-0.52	-7.02	-6.5		S2	-1.78	-8.58	-6.8				S2	-0.74	-7.02	-6.28		S2	-1.64	-8.58	-6.94
S3	-1.48	-7.44	-5.96		S3	-2.18	-8.56	-6.38				S3	-0.99	-7.44	-6.45		S3	-1.82	-8.56	-6.74
S4	-1.15	-7.78	-6.63		S4	-1.55	-8.34	-6.79				S4	-1.01	-7.78	-6.77		S4	-1.46	-8.34	-6.88
S5	-1.11	-7.73	-6.62		S5	-1.33	-8.83	-7.5				S5	-0.75	-7.73	-6.98		S5	-0.98	-8.83	-7.85
AVG			-6.22		AVG			-6.442				AVG			-6.374		AVG			-6.63
SD			0.539212		SD			1.03311				SD			0.613783		SD			1.14359
T-test					T-test							T-test					T-test
Subject 8	Max	MIN	Delta	PRE	S8	Max	MIN	Delta				Subject 8	Max	MIN	Delta	PRE	S8	Max	MIN	Delta
S1	-0.7	-10.54	-9.84		S1	-1.28	-13.6	-12.32				S1	-0.7	-10.54	-9.84		S1	-1.28	-13.6	-12.32
S2	-3.66	-12.65	-8.99		S2	-3.26	-14.16	-10.9				S2	-3.07	-12.65	-9.58		S2	-2.34	-14.16	-11.82
S3	-3.87	-13.17	-9.3		S3	-3.9	-14.92	-11.02				S3	-3.05	-13.17	-10.12		S3	-3.14	-14.92	-11.78
S4	-3.8	-12.12	-8.32		S4	-4.22	-14.55	-10.33				S4	-3.4	-12.12	-8.72		S4	-3.51	-14.55	-11.04
S5	-2.53	-11.03	-8.5		S5	-5.17	-14.75	-9.58				S5	-2.32	-11.03	-8.71		S5	-4.07	-14.75	-10.68
AVG			-8.99		AVG			-10.83				AVG			-8.99		AVG			-11.528
SD			0.613922		SD			1.00916				SD			0.613922		SD			1.00916
T-test					T-test							T-test					T-test
Subject 9	Max	MIN	Delta	PRE	S9	Max	MIN	Delta	POST			Subject 9	Max	MIN	Delta	PRE	S9	Max	MIN	Delta
S1	-1.53	-16.06	-14.53		S1	-1.21	-11.12	-9.91				S1	-1.53	-16.06	-14.53		S1	-1.21	-11.12	-9.91
S2	-2.32	-15.77	-13.45		S2	0.41	-12.08	-12.49				S2	-1.23	-15.77	-14.54		S2	1.26	-12.08	-13.34
S3	-1.23	-16.36	-15.13		S3	0.66	-11.18	-11.84				S3	0.64	-16.36	-17		S3	1.94	-11.18	-13.12
S4	-1.23	-16.03	-14.8		S4	0.03	-11.52	-11.55				S4	-0.94	-16.03	-15.09		S4	1.86	-11.52	-13.38
S5	0	-15.52	-15.52		S5	2.62	-11.17	-13.79				S5	2.08	-15.52	-17.6		S5	2.75	-11.17	-13.92
AVG			-14.686		AVG			-11.916				AVG			-15.752		AVG			-12.734
SD			0.783856		SD			1.41467				SD			1.44681		SD			1.60586
T-test					T-test							T-test					T-test
Subject 10	Max	MIN	Delta	PRE	S10	Max	MIN	Delta	POST			Subject 10	Max	MIN	Delta	PRE	S10	Max	MIN	Delta
S1	-1.27	-9.65	-8.38		S1	-2.45	-10.74	-8.29				S1	-1.27	-9.65	-8.38		S1	-2.45	-10.74	-8.29
S2	-2.53	-10.24	-7.71		S2	-1.68	-11.61	-9.93				S2	-2.73	-10.24	-7.51		S2	-1.27	-11.61	-10.34
S3	-3.59	-10.94	-7.35		S3	-2.06	-12.2	-10.14				S3	-3.48	-10.94	-7.46		S3	-1.51	-12.2	-10.69
S4	-3.93	-11.21	-7.28		S4	-1.38	-12.56	-11.18				S4	-4.11	-11.21	-7.1		S4	-0.88	-12.56	-11.68
S5	-4.49	-11.65	-7.16		S5	-1.25	-12.46	-11.21				S5	-4.47	-11.65	-7.18		S5	-0.82	-12.46	-11.64
AVG			-7.576		AVG			-10.15				AVG			-7.526		AVG			-10.528
SD			0.493994		SD			1.19296				SD			0.508704		SD			1.38147
T-test					T-test							T-test					T-test
Subject 11	Max	MIN	Delta	PRE	S11	Max	MIN	Delta	POST			Subject 11	Max	MIN	Delta	PRE	S11	Max	MIN	Delta
S1	-1.13	-10.85	-9.72		S1	-1.82	-19.22	-17.4				S1	-1.13	-10.85	-9.72		S1	-1.82	-19.22	-17.4
S2	-0.56	-10.93	-10.37		S2	-3.46	-18.9	-15.44				S2	0.13	-10.93	-11.06		S2	-1.38	-18.9	-17.52
S3	0.06	-10.98	-11.04		S3	-3.12	-19.68	-16.56				S3	0.56	-10.98	-11.54		S3	-1.5	-19.68	-18.18
S4	0.08	-10.57	-10.65		S4	-3.58	-20.19	-16.61				S4	0.74	-10.57	-11.31		S4	-0.99	-20.19	-19.2
S5	0.53	-10.85	-11.38		S5	-3.54	-20.14	-16.6				S5	0.69	-10.85	-11.54		S5	-1.66	-20.14	-18.48
AVG			-10.632		AVG			-16.522				AVG			-11.034		AVG			-18.156
SD			0.637707		SD			0.699443				SD			0.760842		SD			0.736804
T-test					T-test							T-test					T-test
Subject 12	Max	MIN	Delta	PRE	S12	Max	MIN	Delta	POST			Subject 12	Max	MIN	Delta	PRE	S12	Max	MIN	Delta
S1	-1.22	-18.44	-17.22		S1	-1.16	-19.77	-18.61				S1	-1.22	-18.44	-17.22		S1	-1.16	-19.77	-18.61
S2	-0.71	-18.5	-17.79		S2	-1.16	-21.27	-20.11				S2	0.15	-18.5	-18.65		S2	1.28	-21.27	-22.55
S3	-1.97	-18.31	-16.34		S3	-0.82	-20.48	-19.66				S3	-0.43	-18.31	-17.88		S3	0.97	-20.48	-21.45
S4	-0.89	-18.05	-17.16		S4	-1.39	-21.01	-19.62				S4	0.32	-18.05	-18.37		S4	0.46	-21.01	-21.47
S5	-1.17	-17.66	-16.49		S5	-0.58	-19.62	-19.04				S5	-0.2	-17.66	-17.46		S5	0.57	-19.62	-20.19
AVG			-17		AVG			-19.408				AVG			-17.916		AVG			-20.854
SD			0.590297		SD			0.585978				SD			0.599692		SD			1.50728
T-test					T-test							T-test					T-test
Subject 13	Max	MIN	Delta	PRE	S13	Max	MIN	Delta	POST			Subject 13	Max	MIN	Delta	PRE	S13	Max	MIN	Delta
S1	-1.11	-11.23	-10.12		S1	-0.3	-7.41	-7.11				S1	-1.11	-11.23	-10.12		S1	-0.3	-7.41	-7.11
S2	-2.46	-8.11	-5.65		S2	-2.3	-8.77	-6.47				S2	-1.94	-8.11	-6.17		S2	-1.59	-8.77	-7.18
S3	-1.2	-7.86	-6.66		S3	-2.72	-8.81	-6.09				S3	-0.43	-7.86	-7.43		S3	-2.03	-8.81	-6.78
S4	-2.28	-10.7	-8.42		S4	-1.97	-7.36	-5.39				S4	-1.75	-10.7	-8.95		S4	-1.19	-7.36	-6.17
S5	-5.56	-8.42	-2.86		S5	-0.07	-10.62	-10.55				S5	-5.09	-8.42	-3.33		S5	0.51	-10.62	-11.13
AVG			-6.742		AVG			-7.122				AVG			-7.2		AVG			-7.674
SD			2.76114		SD			2.01502				SD			2.63057		SD			1.97277
T-test					T-test							T-test					T-test
Subject 14	Max	MIN	Delta	PRE	S14	Max	MIN	Delta	POST			Subject 14	Max	MIN	Delta	PRE	S14	Max	MIN	Delta
S1	-1.37	-18.83	-17.46		S1	-1.04	-14.54	-13.5				S1	-1.37	-18.83	-17.46		S1	-1.04	-14.54	-13.5
S2	-0.91	-17.8	-16.89		S2	2.38	-11.92	-14.3				S2	0.68	-17.8	-18.48		S2	0.61	-11.92	-12.53
S3	0.84	-16.06	-16.9		S3	1.37	-11.61	-12.98				S3	1.27	-16.06	-17.33		S3	0.52	-11.61	-12.13
S4	-0.04	-15.54	-15.5		S4	0.82	-12.94	-13.76				S4	0.18	-15.54	-15.72		S4	0.11	-12.94	-13.05
S5	-0.63	-17.02	-16.39		S5	-0.43	-11.74	-11.31				S5	-0.11	-17.02	-16.91		S5	-1.07	-11.74	-10.67
AVG			-16.628		AVG			-13.17				AVG			-17.18		AVG			-12.376
SD			0.735507		SD			1.14342				SD			0.999425		SD			1.08539
T-test					T-test							T-test					T-test

## Sheet: Reoxy Rate Data
S1	SPRINT	REST	Reoxy Rate %.sec	PRE				S1	SPRINT	REST	Reoxy Rate %.sec	POST
1	-9.22	-3.34	0.147					1	-6.94	-1.53	0.13525
2	-10.37	-2.48	0.19725					2	-8.29	-1.48	0.17025
3	-9.19	-2.13	0.1765					3	-9.57	-0.11	0.2365
4	-9.61	-2	0.19025					4	-11.73	-0.78	0.27375
5	-8.81	-1.1	0.19275					5	-11.29	-0.97	0.258
AVG			0.18075					AVG			0.21475
SD			0.0203938					SD			0.0594246
S4	SPRINT	REST	Reoxy Rate %.sec	PRE				S4	SPRINT	REST	Reoxy Rate %.sec	POST
1	-10.1	-5.02	0.127					1	-11.91	-4.95	0.174
2	-12.7	-5.26	0.186					2	-13	-4.76	0.206
3	-12.63	-3.76	0.22175					3	-13.38	-4.39	0.22475
4	-11.77	-3.09	0.217					4	-11.98	-4.31	0.19175
5	-10.96	-2.66	0.2075					5	-12.77	-4.1	0.21675
AVG			0.19185					AVG			0.20265
SD			0.038766					SD			0.0202366
S5	SPRINT	REST	Reoxy Rate %.sec	PRE				S5	SPRINT	REST	Reoxy Rate %.sec	POST
1	-13.21	-3.96	0.23125					1	-9.96	-1.96	0.2
2	-17.12	-3.03	0.35225					2	-9.85	0.76	0.26525
3	-16.32	-2.13	0.35475					3	-4.81	6.23	0.276
4	-15.55	-3.93	0.2905					4	-10.29	0.36	0.26625
5	-16.16	-3.52	0.316					5	-7.41	1.72	0.22825
AVG			0.30895					AVG			0.24715
SD			0.05099					SD			0.0320354
S6	SPRINT	REST	Reoxy Rate %.sec	PRE				S6	SPRINT	REST	Reoxy Rate %.sec	POST
1	-8.7	-0.56	0.2035					1	-6.01	1.13	0.1785
2	-8.48	-0.16	0.208					2	-6.59	0.95	0.1885
3	-9.32	-1.12	0.205					3	-7.62	0.91	0.21325
4	-9.68	-1.35	0.20825					4	-6.98	0.66	0.191
5	-9.61	-1.54	0.20175					5	-6.58	1.1	0.192
AVG			0.2053					AVG			0.19265
SD			0.00282511					SD			0.0126979
S7	SPRINT	REST	Reoxy Rate %.sec	PRE				S7	SPRINT	REST	Reoxy Rate %.sec	POST
1	-6.98	-2	0.1245					1	-4.52	-2.92	0.04
2	-7.63	-3.04	0.11475					2	-7.98	-3.83	0.10375
3	-7.81	-3.64	0.10425					3	-7.83	-3.9	0.09825
4	-8.43	-3.77	0.1165					4	-7.77	-3.69	0.102
5	-8.14	-3.85	0.10725					5	-7.92	-3.67	0.10625
AVG			0.11345					AVG			0.09005
SD			0.00800273					SD			0.0281299
S8	SPRINT	REST	Reoxy Rate %.sec	PRE				S8	SPRINT	REST	Reoxy Rate %.sec	POST
1	-9.85	-3.96	0.14725					1	-13.05	-4.15	0.2225
2	-12.13	-6.26	0.14675					2	-13.91	-5.4	0.21275
3	-12.78	-7.37	0.13525					3	-14.17	-5.79	0.2095
4	-12.38	-6.69	0.14225					4	-13.53	-5.88	0.19125
5	-10.95	-4.63	0.158					5	-13.98	-5.8	0.2045
AVG			0.1459					AVG			0.2081
SD			0.00830211					SD			0.0114872
S9	SPRINT	REST	Reoxy Rate %.sec	PRE				S9	SPRINT	REST	Reoxy Rate %.sec	POST
1	-14.39	-4.1	0.25725					1	-10.23	-1.35	0.222
2	-15.26	-2.14	0.328					2	-11.87	-0.37	0.2875
3	-15.53	-2.57	0.324					3	-11.59	-0.58	0.27525
4	-13.83	-2.91	0.273					4	-11.16	-0.03	0.27825
5	-13.72	-2.66	0.2765					5	-10.67	-0.22	0.26125
AVG			0.29175					AVG			0.26485
SD			0.0321267					SD			0.0257382
S10	SPRINT	REST	Reoxy Rate %.sec	PRE				S10	SPRINT	REST	Reoxy Rate %.sec	POST
1	-8.31	-4.66	0.09125					1	-10.06	-2.99	0.17675
2	-9.2	-5.53	0.09175					2	-11.44	-2.65	0.21975
3	-10.33	-5.84	0.11225					3	-11.65	-3.02	0.21575
4	-10.75	-6.63	0.103					4	-11.77	-3.06	0.21775
5	-11.04	-7.45	0.08975					5	-11.29	-2.5	0.21975
AVG			0.0976					AVG			0.20995
SD			0.00974615					SD			0.0186333
S11	SPRINT	REST	Reoxy Rate %.sec	PRE				S11	SPRINT	REST	Reoxy Rate %.sec	POST
1	-7.93	-1.05	0.172					1	-16.57	-2.95	0.3405
2	-8.09	-1.2	0.17225					2	-17.52	-5.33	0.30475
3	-8.01	-0.76	0.18125					3	-17.8	-4.82	0.3245
4	-7.85	-1.78	0.15175					4	-19	-7.13	0.29675
5	-8.34	-2.12	0.1555					5	-18.96	-6.25	0.31775
AVG			0.16655					AVG			0.31685
SD			0.0124441					SD			0.0170959
S12	SPRINT	REST	Reoxy Rate %.sec	PRE				S12	SPRINT	REST	Reoxy Rate %.sec	POST
1	-17.08	-7.08	0.25					1	-18.03	-2.87	0.379
2	-18.85	-3.85	0.375					2	-19.38	0.1	0.487
3	-17.98	-4.11	0.34675					3	-18.08	-0.62	0.4365
4	-17.99	-2.9	0.37725					4	-18.31	-1.86	0.41125
5	-18.12	-4.09	0.35075					5	-18.26	-2.24	0.4005
AVG			0.33995					AVG			0.42285
SD			0.0521385					SD			0.0414079
S13	SPRINT	REST	Reoxy Rate %.sec	PRE				S13	SPRINT	REST	Reoxy Rate %.sec	POST
1	-11.99	-4.38	0.19025					1	-7.78	-1.35	0.16075
2	-6.67	-0.47	0.155					2	-8.85	-2.74	0.15275
3	-8.59	-2.17	0.1605					3	-9.15	-2.44	0.16775
4	-10.12	-4.93	0.12975					4	-7.12	-0.95	0.15425
5	-8.99	-2.91	0.152					5	-10.86	-3.86	0.175
AVG			0.1575					AVG			0.1621
SD			0.0217263					SD			0.00934345
S14	SPRINT	REST	Reoxy Rate %.sec	PRE				S14	SPRINT	REST	Reoxy Rate %.sec	POST
1	-16.67	-2.97	0.3425					1	-12.6	-2.72	0.247
2	-16.21	-1.73	0.362					2	-12.5	-2.23	0.25675
3	-15.04	-3.36	0.292					3	-14.74	-2.27	0.31175
4	-16.72	-5.1	0.2905					4	-12.76	-2.92	0.246
5	-17.43	-7.64	0.24475					5	-12.2	-2.92	0.232
AVG			0.30635					AVG			0.2587
SD			0.0465173					SD			0.0309402

## Sheet: Correlation Data
Subjects	% ΔSwim Time Improvement	%ΔHR decrease	% ΔReoxy Rate Increase	%Δ RPE decrease
s1	0.296736	0.884956	16.6667	7.69231
s4	2.33236	6.14035	5.26316	-3.40909
s5	3.36134	7.29927	-19.3548	-8.53659
s6	-0.552486	12.5	-9.52381	11.4943
s7	0.840336	11.9205	-18.1818	7.05882
s8	3.07263	3.10078	40	-4.21053
s9	2.37389	17.3554	-10.3448	-1.1236
s10	5.8642		110	-5.55556
s11	5.27704	6.47482	88.2353	6.12245
s12	-0.617284	9.16667	23.5294	-5.26316
s13	0.581395	1.5625	0	4.34783
s14	-0.295858	31.0345	-16.129	10.4167
